# Supplementary material for: Zinc(II)-Sterol Hydrazone Complex as a Potent Anti-Leishmania Agent: Synthesis, Characterization, and Insight into Its Mechanism of Antiparasitic Action
Source: MDPI journal article supplement (doi:10.3390/pharmaceutics15041113), 2023-03-31
Supplement: s1 [file s1]

# **Zinc(II)-Sterol Hydrazone Complex as a Potent Anti-*Leishmania* Agent: Synthesis, Characterization, and Insight into Its Mechanism of Antiparasitic Action**

Gonzalo Visbal <sup>1,\*</sup>, Rodrigo M. S. Justo <sup>2,†</sup>, Gabrielle dos Santos da Silva e Miranda <sup>3,†</sup>, Sara Teixeira de Macedo Silva <sup>4</sup>, Wanderley de Souza <sup>5,6</sup>, Juliany Cola Fernandes Rodrigues <sup>3</sup> and Maribel Navarro <sup>2,\*</sup>

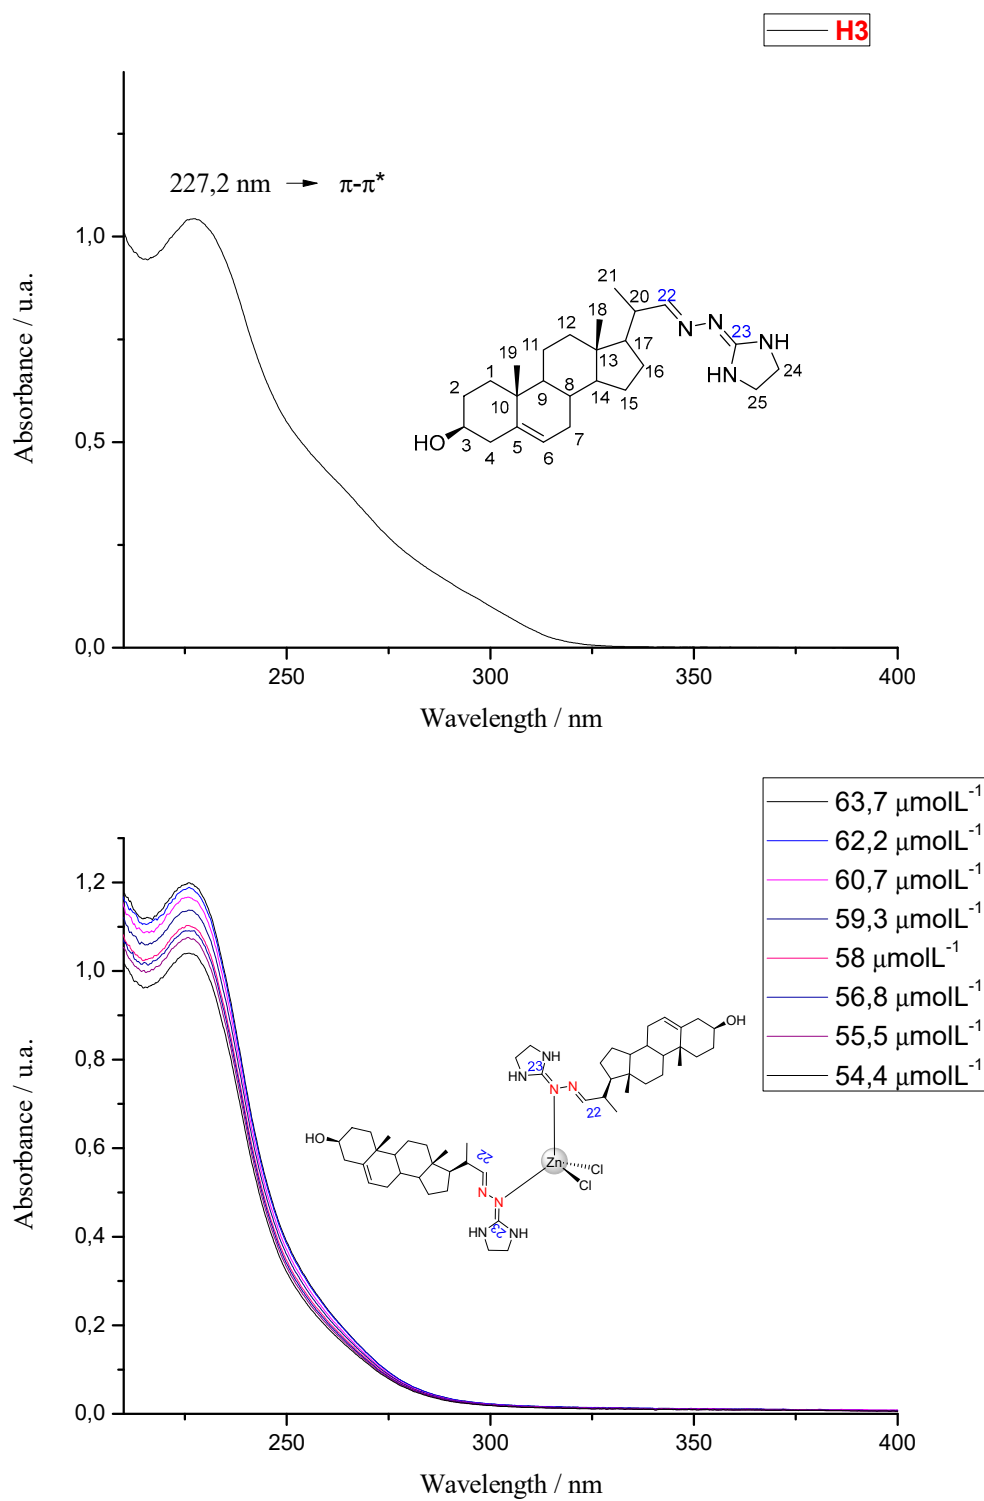

Figure S1. UV absorption spectra of the free ligand **H3** and molar absorptivity spectra for the complex  $\text{ZnCl}_2(\text{H3})_2$

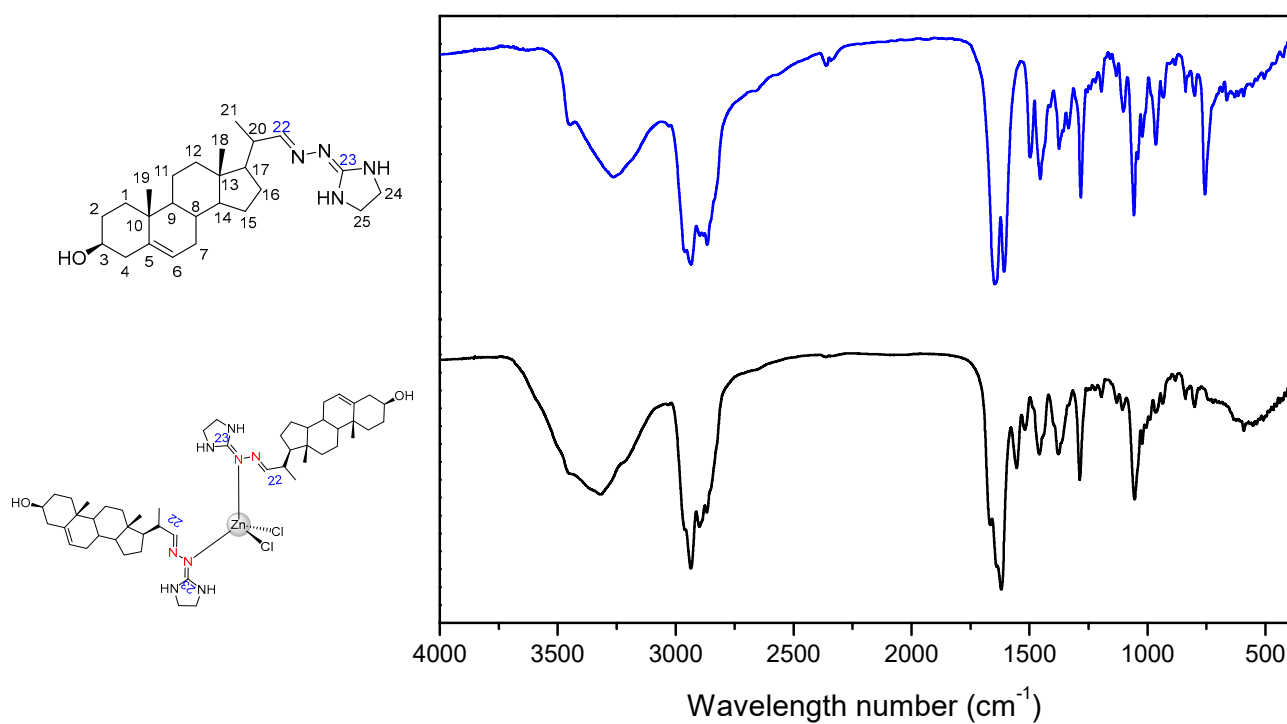

Figure S2. Comparison of the infrared spectra of the free ligand **H3** and the complex  $\text{ZnCl}_2(\text{H3})_2$

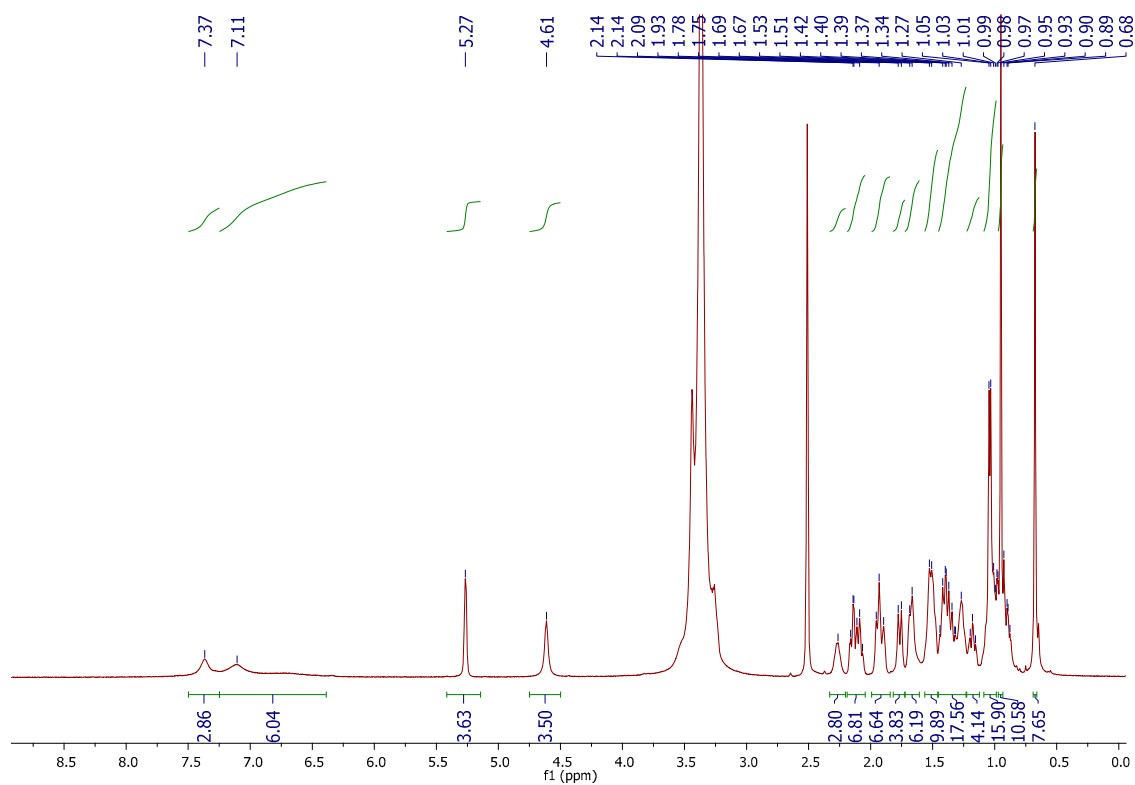

Figure S3.  $^1\text{H}$  NMR spectrum of  $\text{ZnCl}_2(\text{H3})_2$  in  $\text{DMSO-}d_6$ .

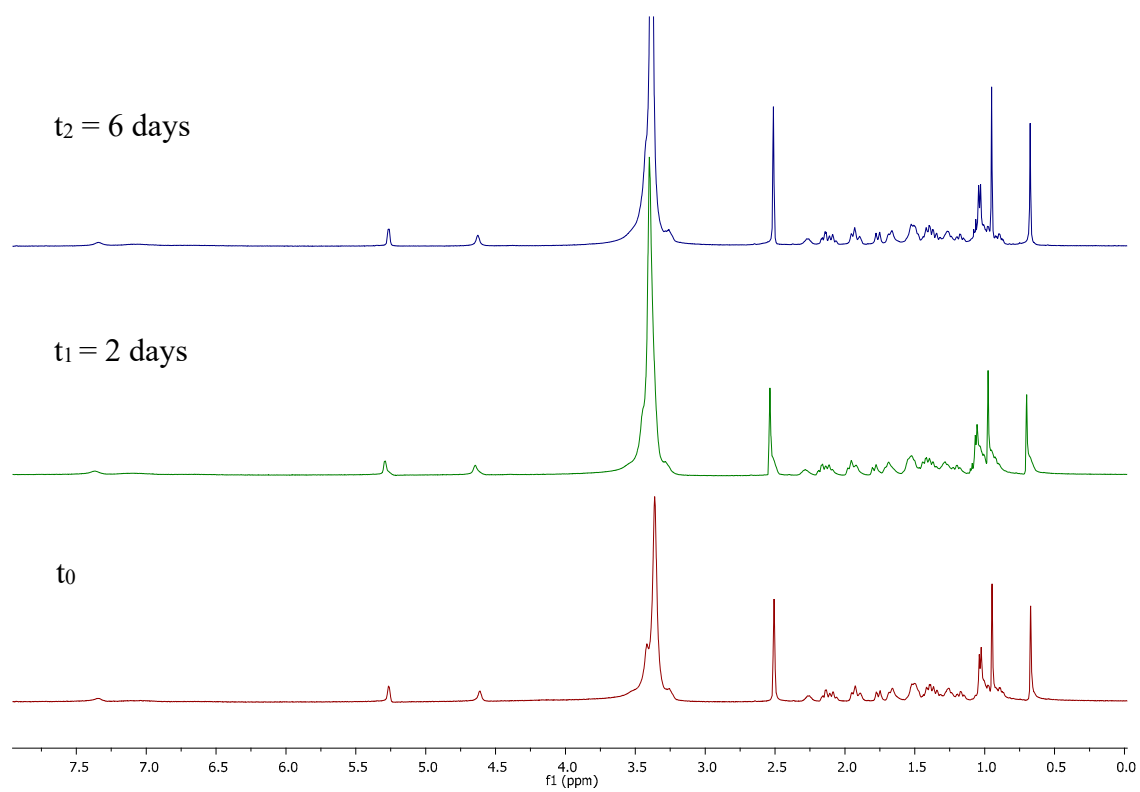

Figure S4. Stability study of  $\text{ZnCl}_2(\text{H3})_2$  by  $^1\text{H}$  NMR in  $\text{DMSO-}d_6$  as solvent.
